# Supplementary material for: Distribution of nutrients and dissolved organic matter in a eutrophic equatorial estuary: the Johor River and the East Johor Strait
Source: Copernicus journal article supplement (doi:10.5194/bg-21-2955-2024), 2024-06-18
Supplement: Supplementary file 1 [file bg-21-2955-2024-supplement.pdf]

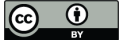

*Supplement of*

## **Distribution of nutrients and dissolved organic matter in a eutrophic equatorial estuary: the Johor River and the East Johor Strait**

**Amanda Y. L. Cheong et al.**

*Correspondence to:* Patrick Martin ([pmartin@ntu.edu.sg](mailto:pmartin@ntu.edu.sg))

The copyright of individual parts of the supplement might differ from the article licence.

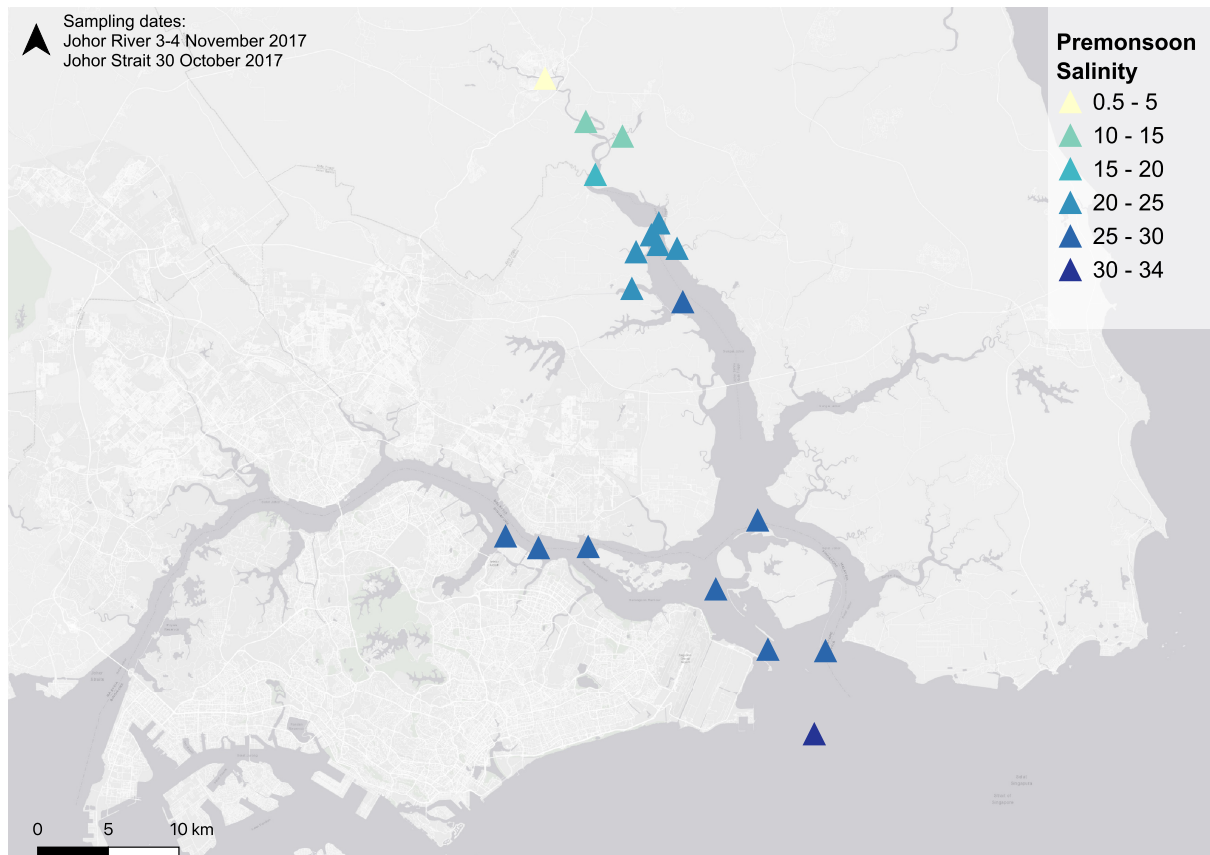

Figure S1: Surface salinity measured during pre-monsoon sampling on 30 October 2017 (for Johor Strait stations) and on 03–04 November 2017 (for Johor River stations). Basemap credit: ESRI.

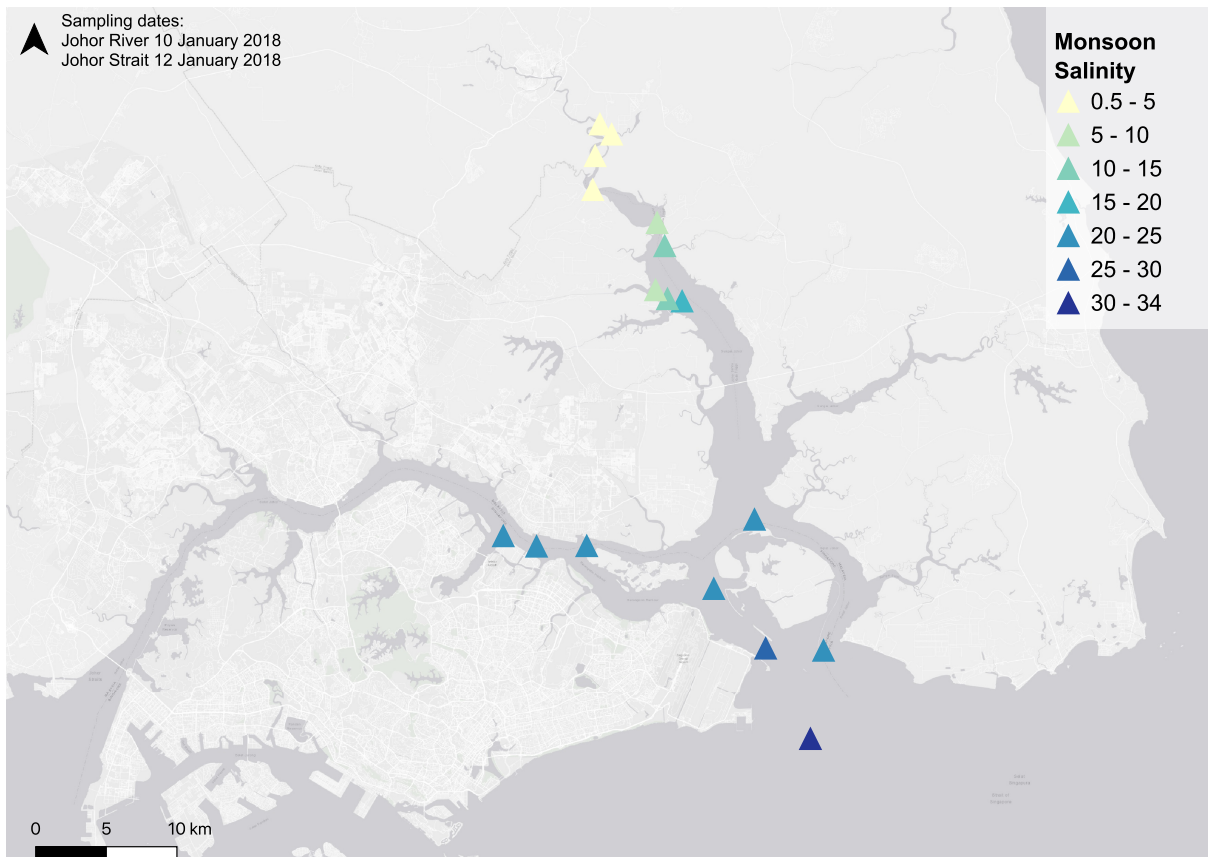

Figure S2. Surface salinity measured during northeast monsoon sampling on 12 January 2018 (for Johor Strait stations) and on 10 January 2018 (for Johor River stations). Basemap credit: ESRI.

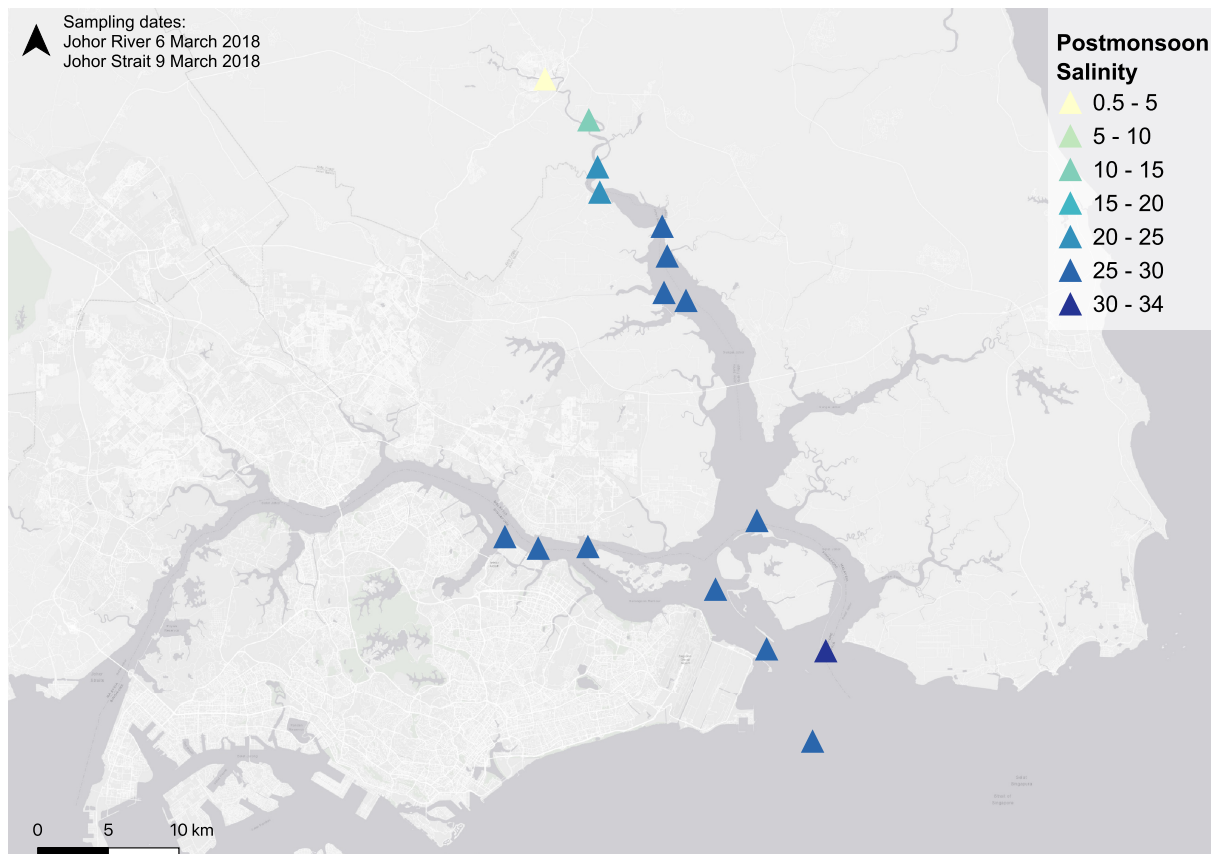

Figure S3. Surface salinity measured during post-monsoon sampling on 09 March 2018 (for Johor Strait stations) and on 06 March 2018 (for Johor River stations). Basemap credit: ESRI.
